# Supplementary material
Source: PubMed Central journal article supplement (PMC5779864)
Supplement: NIHMS933982-supplement-SI.pdf [file NIHMS933982-supplement-SI.pdf]

# Supporting Information

## Detection and quantification of hydrogen peroxide in aqueous solutions using chemical exchange saturation transfer (CEST)

David Ryoo,<sup>†,‡,§</sup> Xiang Xu,<sup>†,‡</sup> Yuguo Li,<sup>†,‡</sup> Joel A. Tang,<sup>§</sup> Jia Zhang,<sup>†,‡</sup> Peter C.M. van Zijl,<sup>†,‡</sup> and Guanshu Liu<sup>†,‡,\*</sup>

<sup>†</sup>F.M. Kirby Research Center for Functional Brain Imaging, Kennedy Krieger Institute, Baltimore, Maryland; <sup>#</sup>Department of Radiology; <sup>‡</sup>Department of Chemical & Biomolecular Engineering, <sup>§</sup>Department of Chemistry; Johns Hopkins University, Baltimore, Maryland.

### Table Of Contents

|                                                                                                                                                     |   |
|-----------------------------------------------------------------------------------------------------------------------------------------------------|---|
| S1. EFFECT OF H <sub>2</sub> O <sub>2</sub> ON WATER RELAXATION TIMES.....                                                                          | 2 |
| S2. SATURATION TIME (T <sub>SAT</sub> ) AND SATURATION POWER (B <sub>1</sub> ) DEPENDENCE OF THE CEST SIGNAL OF H <sub>2</sub> O <sub>2</sub> ..... | 3 |
| S3. ESTIMATION OF EXCHANGE RATE OF H <sub>2</sub> O <sub>2</sub> USING THE QUEST METHOD.....                                                        | 3 |
| S4. PH DEPENDENCE OF THE NMR AND CEST SIGNAL OF H <sub>2</sub> O <sub>2</sub> .....                                                                 | 4 |
| S5. REPEATABILITY OF CEST MR MEASUREMENT.....                                                                                                       | 7 |
| S6. DETECTABILITY OF CEST MR MEASUREMENT.....                                                                                                       | 7 |
| REFERENCES.....                                                                                                                                     | 7 |

### S1. Effect of H<sub>2</sub>O<sub>2</sub> on water relaxation times.

**Method:** Longitudinal (T<sub>1</sub>) relaxation times of the samples were assessed using a RARE-based saturation recovery sequence with eight T<sub>R</sub> times ranging between 200 ms to 15,000 ms. T<sub>1</sub> relaxation times were estimated by fitting the ROI values to Equation S4 using Matlab,

$$S(T_R) = M_0 \times [1 - \exp(-\frac{T_R}{T_1})] \quad \text{Eq. S1}$$

where S(T<sub>R</sub>) are the MRI signal at each T<sub>R</sub> time, and the theoretical maximal MRI signal S<sub>0</sub> and T<sub>1</sub> time are the parameters to be estimated.

T<sub>2</sub> relaxation times were acquired using a Carr-Purcell-Meiboom-Gill (CPMG) method<sup>1</sup>. Briefly, a T<sub>2</sub> preparation module was added in the front of a fast spin-echo imaging readout, i.e., Acquisition with Relaxation Enhancement (RARE) pulse sequence. The T<sub>2</sub> preparation period consisted of an element of CPMG pulse train with t<sub>CPMG</sub> = 10 ms. We used a total 16 CPMG loop number from 2 to 1024, making the echo times from 20 ms to 10.24 sec. The imaging parameters were: T<sub>R</sub>/T<sub>E</sub>=25000/4.3 ms, RARE factor=16, a 64x64 acquisition matrix with a spatial resolution of c.a. 250x250 μm<sup>2</sup>, and slice thickness of 1 mm. The acquisition time for each T<sub>2</sub>-weighted image was 1 min 40 s. To obtain r<sub>2ex</sub> of the compound, T<sub>2</sub> relaxation times of the compound at different concentrations, i.e., 1, 2, 5 and 10 mM, were measured and fitted to Equation S1.

$$R_2 = R_2^0 + r_2 \times [C] \quad \text{Eq. S2}$$

Where R<sub>2</sub><sup>0</sup> is the inherent R<sub>2</sub> relaxation rate of the solutions and [C] is the concentration of the agent.

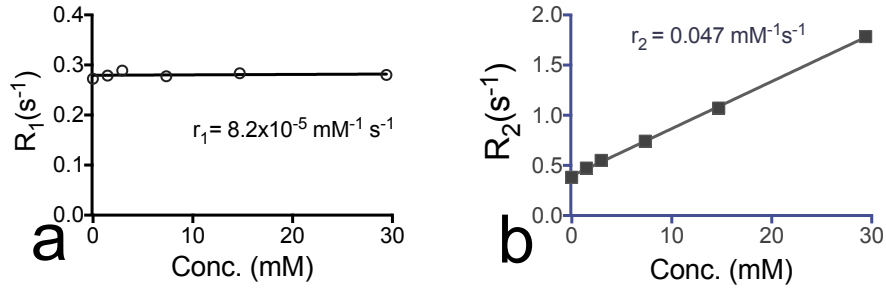

**Figure S-1.** Longitudinal (a) and transverse (b) relaxation rates of H<sub>2</sub>O<sub>2</sub> solution of different concentrations.

### S2. Saturation time ( $T_{\text{sat}}$ ) and saturation power ( $B_1$ ) dependence of the CEST signal of H<sub>2</sub>O<sub>2</sub>

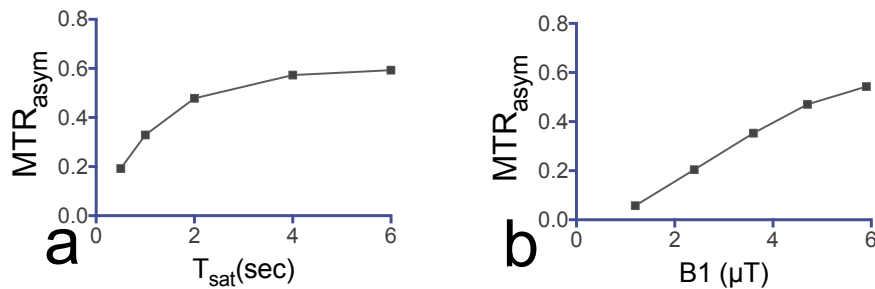

**Figure S-2.** Saturation parameter dependence of the CEST signal of 1% H<sub>2</sub>O<sub>2</sub>. (a) CEST signal with saturation time ( $t_{\text{sat}}$ ) of 1, 2, 3, 4 and 6 sec, and a fixed saturation field strength ( $B_1$ ) of 4.7  $\mu\text{T}$ ; and (b) CEST signal with  $B_1$  of 1.2, 2.4, 3.6, 4.7 and 5.9  $\mu\text{T}$  and a fixed  $t_{\text{sat}}$  of 4 sec. All data were corrected for  $B_0$  inhomogeneity using the WASSR method<sup>2,3</sup>.

### S3. Estimation of exchange rate of H<sub>2</sub>O<sub>2</sub> using the QUEST method

**Method:** The exchange rate of exchangeable protons of H<sub>2</sub>O<sub>2</sub> (6.2 ppm) at pH 6.0 was measured using the QUantifying Exchange using Saturation Time (QUEST) method<sup>4</sup>. In brief, the CEST contrast for samples containing 1% H<sub>2</sub>O<sub>2</sub> (60 mM of exchangeable protons) at pH 6.0 was measured with saturation delays of 0.5, 1, 2, 4, and 6 sec, using

a saturation field strength of 5.9  $\mu\text{T}$  (250Hz) and the repetition time (TR) set to 10 sec, using the RARE imaging sequence. The calculated  $\text{MTR}_{\text{asym}}$  values were then fit using numerical solutions to the Bloch equations with exchange rate ( $k_{\text{ex}}$ ) and water  $T_{2\text{W}}$  being the free parameter. The fixed model parameters were water  $R_{1\text{W}}=0.283 \text{ s}^{-1}$ , solute  $R_{1\text{S}}=R_{1\text{W}}=0.283 \text{ s}^{-1}$  and solute  $R_{2\text{S}}=66 \text{ s}^{-1}$ .

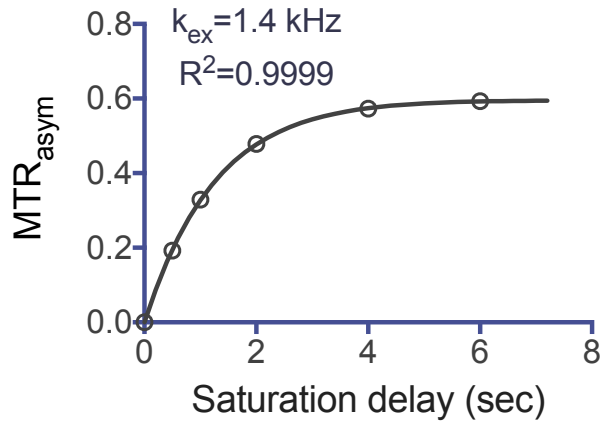

**Figure S-3: Estimation of exchange rate of 1%  $\text{H}_2\text{O}_2$  at 6.2 ppm at pH=6.0 and 37°C using the QUEST method.**

#### **S4. pH dependence of the NMR and CEST signal of $\text{H}_2\text{O}_2$**

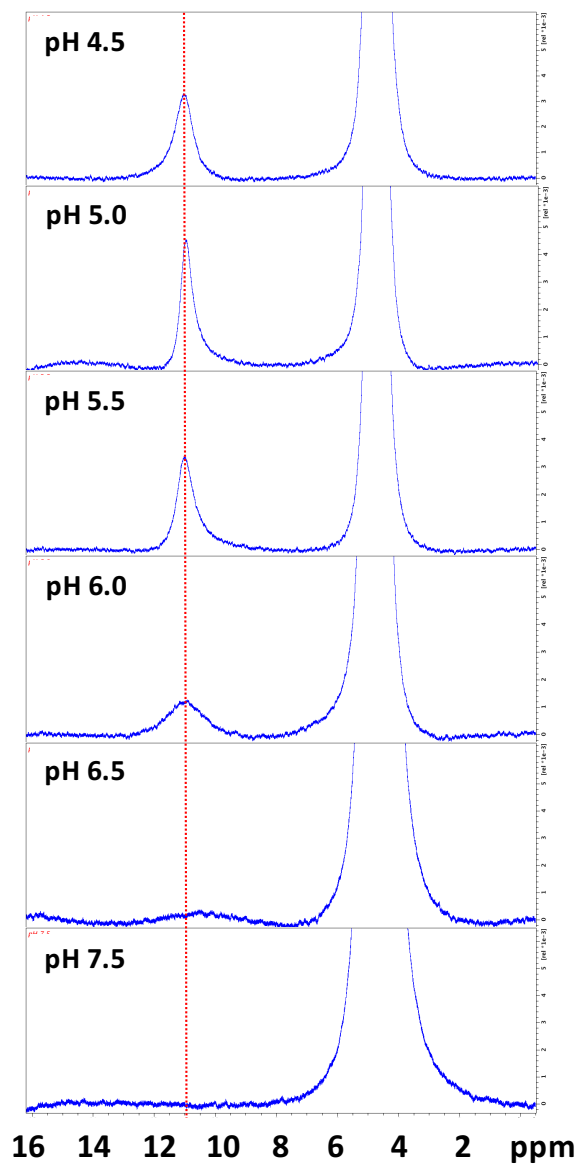

**Figure S-4.** NMR <sup>1</sup>H spectra of 1% H<sub>2</sub>O<sub>2</sub> solutions at different pHs. The solvent used in is 90% H<sub>2</sub>O +10% D<sub>2</sub>O. Red dotted line indicates the chemical shift of 11 ppm (or 6.3 ppm apart from water). The measurement was conducted using a standard 1D NMR pulse sequence at room temperature on a Bruker Avance III 500 MHz NMR spectrometer. The number of average was 128.

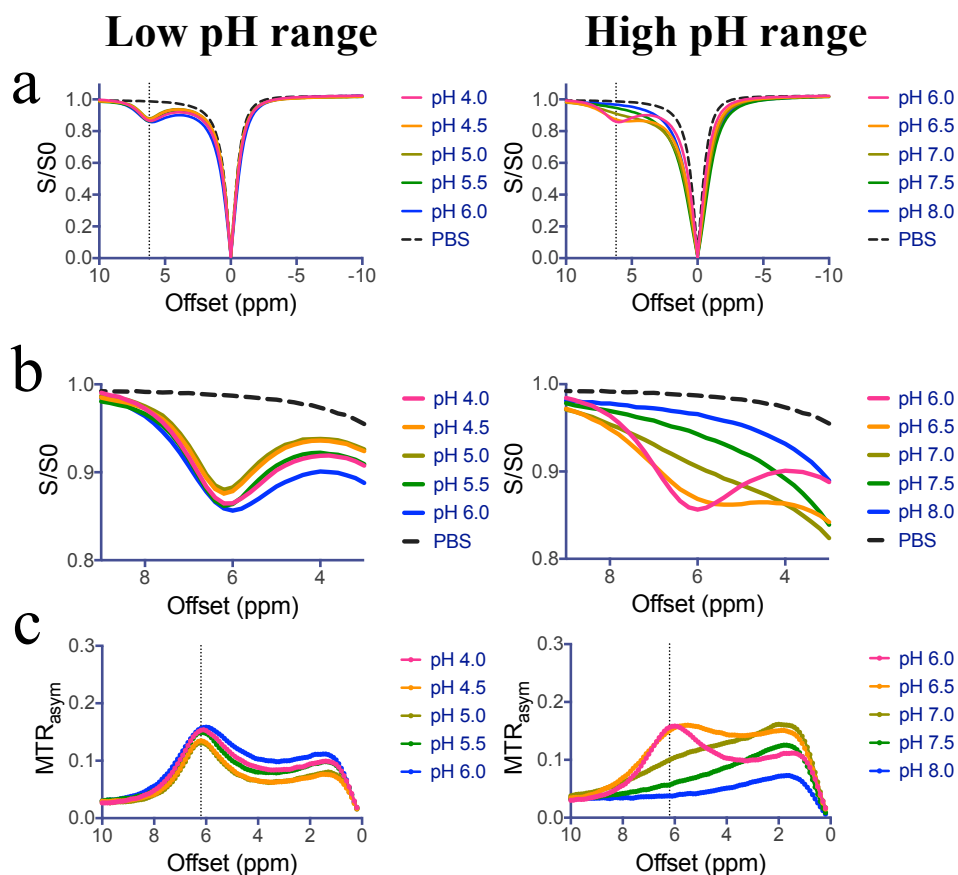

**Figure S-5. CEST MRI contrast of  $\text{H}_2\text{O}_2$  solutions at different pHs.** **a)** Z-spectra (-10 to 10 ppm) of  $\text{H}_2\text{O}_2$  in the low and high pH range; **b)** The zoomed view of the corresponding Z-spectra in **(a)** around 6.2 ppm; and **(c)**  $\text{MTR}_{\text{asym}}$  plots in the low and high pH range. It is interesting that the peak at  $\sim 1$  ppm has a much less sensitivity to the change in pH. For example, at high pH, the 6.2 ppm peak completely disappears. While the 1 ppm peak also dramatically decreased, it still has detectable signal, for example  $0.054 \pm 0.018$  at pH 8.0. Thus, the pH-dependence study indicates the exchange rate of 1 ppm is much slower than that of 6.2 ppm.

## S5. Repeatability of CEST MR measurement

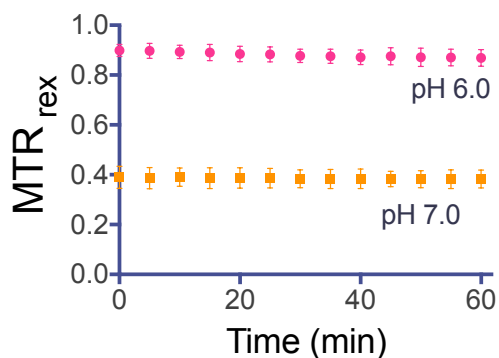

**Figure S-6. Repeatability of CEST UFZ NMR measurement.** For each pH, triplicate samples were prepared. Each sample was measured using the UFZ method intermittently every five minutes for one hour. The temperature was maintained at 37 °C throughout the study.

## S6. Detectability of CEST MR measurement

**Table S-1. The minimal concentration H<sub>2</sub>O<sub>2</sub> using CEST NMR method and the corresponding P values (n=3)**

|                      |           | pH 4.0 | pH 4.5 | pH 5.0 | pH 5.5 | pH 6.0 | pH 6.5 | pH 7.0 | pH 7.5 | pH 8.0 |
|----------------------|-----------|--------|--------|--------|--------|--------|--------|--------|--------|--------|
| <b>Minimal conc.</b> | <b>mM</b> | 1.5    | 1.5    | 1.5    | 0.7    | 0.7    | 1.5    | 1.5    | 1.5    | 14.7   |
|                      | <b>%</b>  | 0.005  | 0.005  | 0.005  | 0.0025 | 0.0025 | 0.005  | 0.005  | 0.005  | 0.05   |
| <b>P value</b>       |           | 0.0159 | 0.0147 | 0.0806 | 0.0028 | 0.0369 | 0.0123 | 0.0113 | 0.0192 | 0.0114 |

## References

- (1) Yadav, N. N.; Xu, J.; Bar-Shir, A.; Qin, Q.; Chan, K. W.; Grgac, K.; Li, W.; McMahon, M. T.; van Zijl, P. C. *Magn Reson Med* **2014**, *72*, 823-828.
- (2) Liu, G.; Gilad, A. A.; Bulte, J. W.; van Zijl, P. C.; McMahon, M. T. *Contrast Media Mol. Imaging* **2010**, *5*, 162-170.
- (3) Kim, M.; Gillen, J.; Landman, B.; Zhou, J.; van Zijl, P. *Magnetic Resonance in Medicine* **2009**, *61*, 1441-1450.
- (4) McMahon, M. T.; Gilad, A. A.; Zhou, J.; Sun, P. Z.; Bulte, J. W.; van Zijl, P. C. *Magnetic Resonance in Medicine* **2006**, *55*, 836-847.
